# Supplementary material for: Continuous catalytic upgrading of ethanol to n-butanol over Cu–CeO2/AC catalysts
Source: Royal Society of Chemistry journal article supplement (doi:10.1039/c6cc05860d), 2016-01-01
Supplement: c6cc05860d1.pdf [file c6cc05860d1.pdf]

**Supporting information**

**Continuous catalytic upgrading of ethanol to n-butanol over Cu-  
CeO<sub>2</sub>/AC catalysts**

Dahao Jiang, Xianyuan Wu, Jun Mao, Jun Ni\*, Xiaonian Li\*

State Key Laboratory Breeding Base of Green Chemistry Synthesis Technology,  
Institute of Industrial Catalysis, Zhejiang University of Technology, Hangzhou  
310014, China

E-mail addresses: [junni@zjut.edu.cn](mailto:junni@zjut.edu.cn) (J. Ni), [xnli@zjut.edu.cn](mailto:xnli@zjut.edu.cn) (X. Li).

## Table of Contents

1. Experimental methods
2. Fig. S1. Ethanol conversion and n-butanol yield over Cu-CeO<sub>2</sub>/AC catalysts with the different Cu/Ce molar ratios
3. Fig. S2. XRD patterns of reduced catalysts before and after reaction
4. Fig. S3. CO<sub>2</sub>-TPD profile of AC support
5. Fig. S4. CO<sub>2</sub>-TPD profile of CeO<sub>2</sub>/AC
6. Fig. S5. TPR profile of AC support
7. Fig. S6. TPR profile of CeO<sub>2</sub>/AC
8. Fig. S7. TEM images and corresponding EDX mapping of (A), (B) 3Cu1Ce/SiO<sub>2</sub> and (C), (D) 3Cu1Ce/Al<sub>2</sub>O<sub>3</sub> catalysts after reaction
9. Fig. S8. Dependence of the hydrogenation of crotonaldehyde on reaction temperature
10. Fig. S9. Function-curves for the overall yield of aldehyde ( $Y_{\text{aldehyde}}$ ) to W/F
11. Fig. S10. Function-curves for the logarithm of reaction rate of ethanol dehydrogenation ( $\ln r_{\text{aldehyde}}$ ) to the logarithm of partial pressure of ethanol ( $\ln P_{\text{ethanol}}$ )

- 12. Fig. S11. Function-curves for the overall yield of condensation products ( $Y_{\text{condensation}}$ ) to W/F**
- 13. Fig. S12. Function-curves for the logarithm of reaction rate of aldehyde condensation ( $\ln r_{\text{condensation}}$ ) to the logarithm of partial pressure of aldehyde ( $\ln P_{\text{aldehyde}}$ )**
- 14. Fig. S13. Function-curves for the overall yield of hydrogenation products ( $Y_{\text{hydrogenation}}$ ) to W/F**
- 15. Fig. S14. Function-curves for the logarithm of reaction rate of crotonaldehyde hydrogenation ( $\ln r_{\text{hydrogenation}}$ ) to the logarithm of partial pressure of crotonaldehyde ( $\ln P_{\text{crotonaldehyde}}$ )**
- 16. Fig. S15. Arrhenius plots for (A) ethanol dehydrogenation, (B) acetaldehyde condensation and (C) crotonaldehyde hydrogenation**
- 17. Table S1. Textural properties of Cu-based catalysts**
- 18. Table S2. Catalytic performance of various Cu-based catalysts**
- 19. Table S3. Comparison of catalytic performance of Cu-CeO<sub>2</sub>/AC catalysts with other catalysts reported in documentary**

- 20. Table S4. Experiment data for macro-kinetics of ethanol dehydrogenation**
- 21. Table S5. Experiment data for macro-kinetics of acetaldehyde condensation**
- 22. Table S6. Experiment data for macro-kinetics of crotonaldehyde hydrogenation**
- 23. Table S7. The rate constants and reaction orders of different temperature for various reactions**
- 24. Table S8. The apparent activation energies and frequency factors for various reactions**
- 25. Scheme S1. The Guerbet reaction pathway**
- 26. Scheme S2. The hydrogen-transfer pathway**

## 1. Experimental methods

**Catalyst preparation.** Cu-CeO<sub>2</sub>/AC catalysts with 10 wt.% of Cu loading and different molar ratios of Cu/Ce were prepared by a wetness impregnation method as follows: AC supports were impregnated with appropriate amount of ethanol solution of Cu(NO<sub>3</sub>)<sub>2</sub>·3H<sub>2</sub>O and Ce(NO<sub>3</sub>)<sub>3</sub>·6H<sub>2</sub>O for 4 h. Excess solvents were then removed at 298 K in a rotary evaporator. The resultant composite was dried in ambient air at 383 K for 4 h and subsequently calcined in nitrogen flow at 723 K for 2 h in a tube furnace. Cu-CeO<sub>2</sub>/SiO<sub>2</sub> and Cu-CeO<sub>2</sub>/Al<sub>2</sub>O<sub>3</sub> with Cu/Ce molar ratio of 3:1, as well as Cu/AC and Cu/CeO<sub>2</sub> with Cu loading of 10 wt.%, were prepared by the same method as reference. These catalysts with the different molar ratios of Cu/Ce are designated as xCu<sub>y</sub>Ce/z; here x:y indicates the molar ratio of Cu/Ce, while z indicates AC, SiO<sub>2</sub> and Al<sub>2</sub>O<sub>3</sub>.

**Catalyst characterization.** The parameters of pore structure of catalysts were determined by N<sub>2</sub> adsorption using Quantachrome NOVA 1000e apparatus with liquid-N<sub>2</sub> at the temperature of 77 K. The samples were outgassed at 473 K for 4 h prior to analysis. XRD data were collected on an X'Pert PRO X-ray diffractometer between 2θ = 10° and 80° at 2° min<sup>-1</sup> employing a Cu-Kα radiation source (λ = 0.15406 nm). Transmission electron microscopy (TEM) observation and corresponding elemental analysis were performed on an instrument (Tecnai G2 F30 S-Twin, 300 kV) from Philips-FEI Company.

TPR and CO<sub>2</sub>-TPD experiments were performed on a TPR/TPD apparatus made in our lab. Hundred milligrams of the samples were placed in a quartz reactor and reduced by a 10% H<sub>2</sub>-Ar gas mixture in a flow rate of 30 ml/min with temperature ramping at 10 K/min. By using a thermal conductivity detector (TCD) to monitor the outlet gases after cold traps (to remove H<sub>2</sub>O), TPR profiles were obtained. For CO<sub>2</sub>-TPD experiments, catalysts were pre-reduced for 1 h in a flow of 10% H<sub>2</sub>-Ar gas mixture at 523 K, purged by Ar at the same temperature for 0.5 h, and then cooled

down to 323 K. The CO<sub>2</sub> saturation uptake of the reduced catalysts was achieved by passing pure CO<sub>2</sub> for 0.5 h at 30 ml/min. After the CO<sub>2</sub> adsorption, the catalyst was purged again by He for 30 min at 323 K. Then the temperature was linearly increased from 323 K to 1073 K at 10 K/min, while CO<sub>2</sub>-TPD profiles were recorded with the TCD.

**Catalytic test.** The catalytic tests were performed in a fixed-bed reactor. Typically, 1.0g of catalyst (20-40 mesh) was placed in a tubular reactor (30 cm length, 8 mm internal diameter) and then was reduced by a 10% H<sub>2</sub>-N<sub>2</sub> gas mixture at 523 K for 1 h. The reaction was carried out under the following conditions: 523 K, 2 MPa, LHSV=4 ml/(h·g cat) and N<sub>2</sub>/ethanol = 500:1 (v/v). The liquid products were analyzed by a Gas chromatograph (GC) with a flame ionization detector (FID) and an HP-5 column (30 m, 0.25 mm inner diameter) or an FFAP column (30 m, 0.25 mm inner diameter). 2-ethyl-hexanol was used as the internal standard for the quantification of the liquid products. The outlet gases from the condenser were analyzed by the GC with a TCD and an HP-PLOT/Q column (30 m, 0.32 mm inner diameter).

The ethanol conversion, selectivity and yield of products are calculated as follows:

$$\text{Ethanol conversion (\%)} = \frac{1 - C \text{ mol of unreacted ethanol}}{C \text{ mol of (products + unreacted ethanol)}} \times 100\%$$

$$\text{Product selectivity (\%)} = \frac{C \text{ mol of specific product}}{C \text{ mol of products}} \times 100\%$$

$$\text{Product yield (\%)} = \text{Ethanol conversion} \times \text{Product selectivity}$$

where C mol is the mole number of carbon in the products and unreacted ethanol.

**Kinetic experiments.** Kinetic measurements for various reaction components (ethanol dehydrogenation/ acetaldehyde condensation/ crotonaldehyde hydrogenation) were separately carried out using the same fixed-bed reactor described above. Kinetic data were obtained with different contact times and feedstock partial pressures by

varying the flow rates of carrier gases and feedstock. For example, the overall aldehyde yields with different contact times and different ethanol partial pressures were gained by varying the flow rates of N<sub>2</sub> and ethanol. Specifically, for acetaldehyde condensation, toluene and 10 vol.% acetaldehyde in toluene were independently introduced into a N<sub>2</sub> stream flowing at given flow rates using two syringe pumps, while cyclohexane and 10 vol.% crotonaldehyde in cyclohexane were individually introduced into a H<sub>2</sub> stream flowing for crotonaldehyde hydrogenation. For the studies of reaction kinetics, the system was allowed to reach steady-state under constant reaction conditions before recording the kinetic data. The analytic methods of products were the same as those stated in the catalytic test.

For the analysis of kinetic data, function-curves for the overall yields of the dehydrogenation, condensation or hydrogenation products to W/F were first gained by data fitting. And then reaction rates of above three reactions were calculated by taking the derivative of functions of the overall yields to W/F.

The rate constants and reaction orders at different temperatures for various reactions were achieved by fitting the data groups of both logarithm of reaction rates and partial pressures of feedstock. Finally, the apparent activation energies and frequency factors for various reaction components were achieved by drawing the Arrhenius plots.

## 2. Ethanol conversion and n-butanol yield over Cu-CeO<sub>2</sub>/AC catalysts with the different Cu/Ce molar ratios

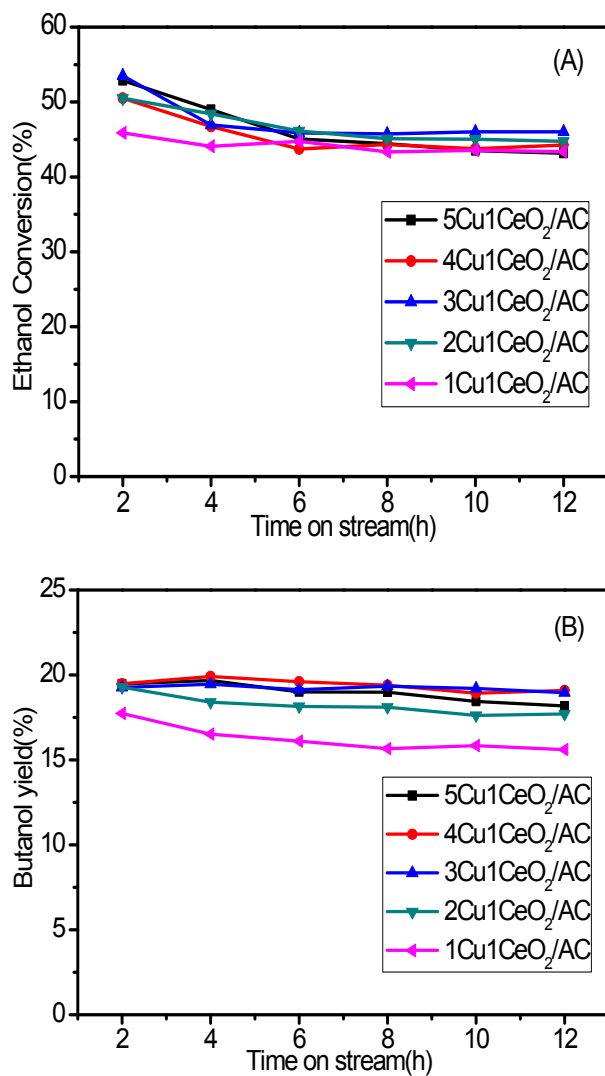

**Fig. S1.** Ethanol conversion (A) and n-butanol yield (B) over Cu-CeO<sub>2</sub>/AC catalysts with the different Cu/Ce molar ratios



### 3. XRD patterns of reduced catalysts before and after reaction

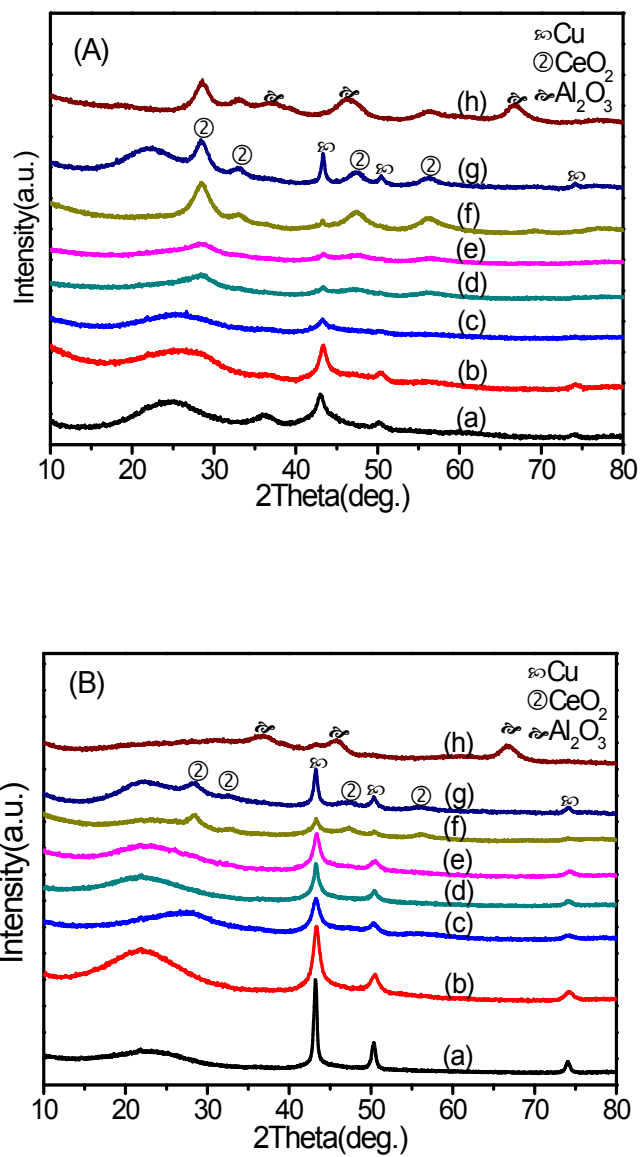

**Fig. S2.** XRD patterns of reduced catalysts (A) before and (B) after reaction: (a)Cu/AC; (b)5Cu1Ce/AC; (c)4Cu1Ce/AC; (d)3Cu1Ce/AC; (e)2Cu1Ce/AC; (f)1Cu1Ce/AC; (g)3Cu1Ce/SiO<sub>2</sub>; (h)3Cu1Ce/Al<sub>2</sub>O<sub>3</sub>

#### 4. CO<sub>2</sub>-TPD profile of AC support

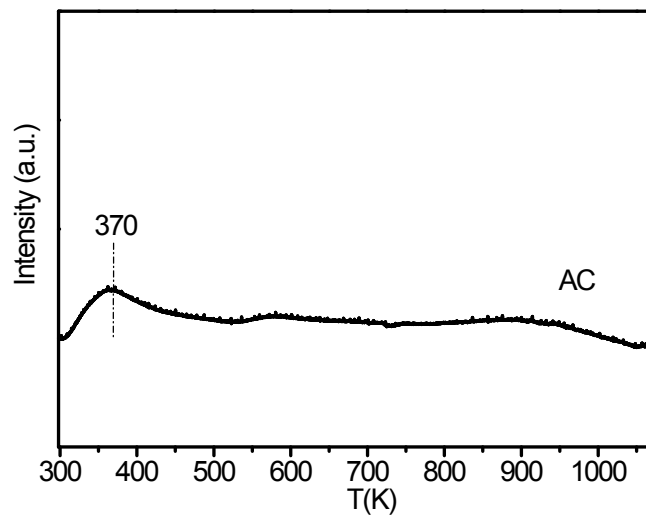

Fig. S3. CO<sub>2</sub>-TPD profile of AC support

#### 5. CO<sub>2</sub>-TPD profile of CeO<sub>2</sub>/AC

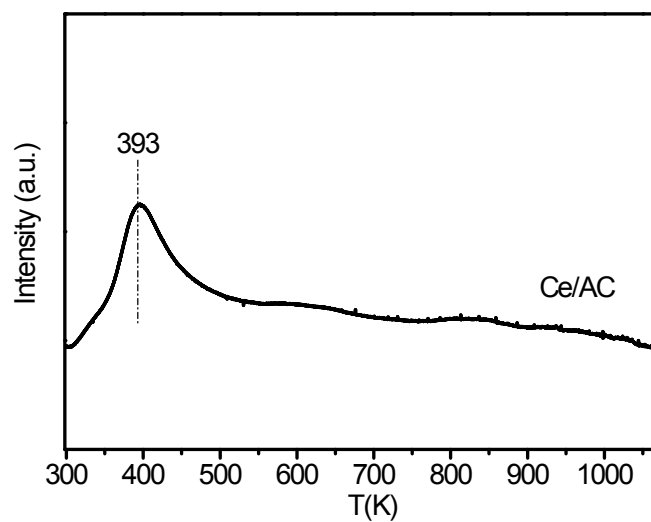

Fig. S4. CO<sub>2</sub>-TPD profile of CeO<sub>2</sub>/AC

## 6. TPR profile of AC support

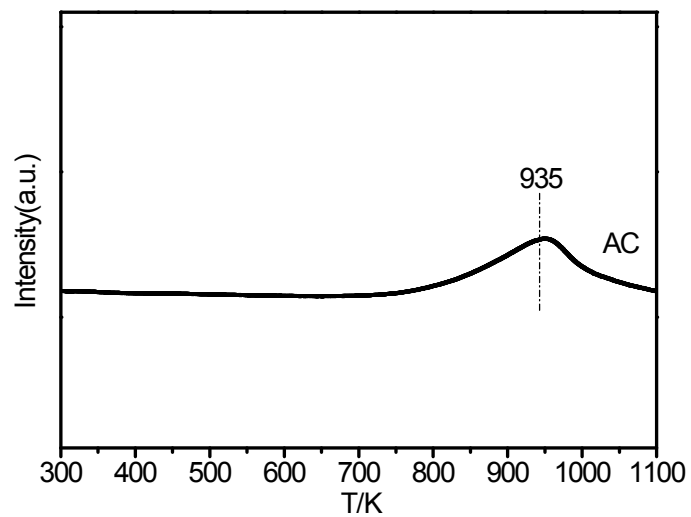

Fig. S5. TPR profile of AC support

## 7. TPR profile of CeO<sub>2</sub>/AC

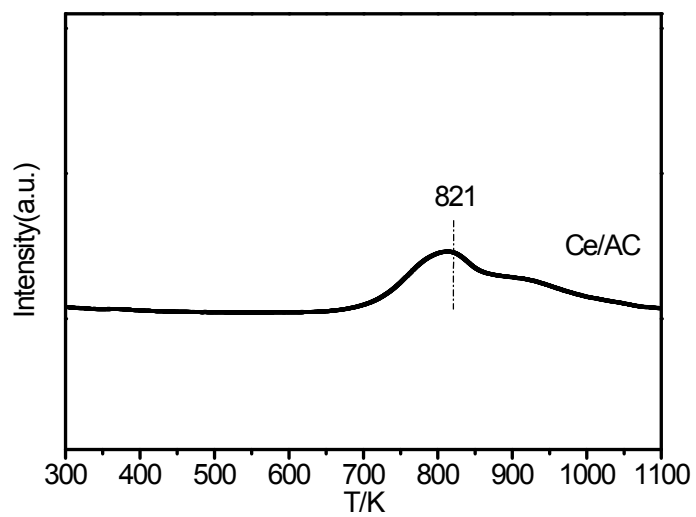

Fig. S6. TPR profile of CeO<sub>2</sub>/AC

8. TEM images and corresponding EDX mapping of (A), (B) 3Cu1Ce/SiO<sub>2</sub> and (C), (D) 3Cu1Ce/Al<sub>2</sub>O<sub>3</sub> catalysts after reaction

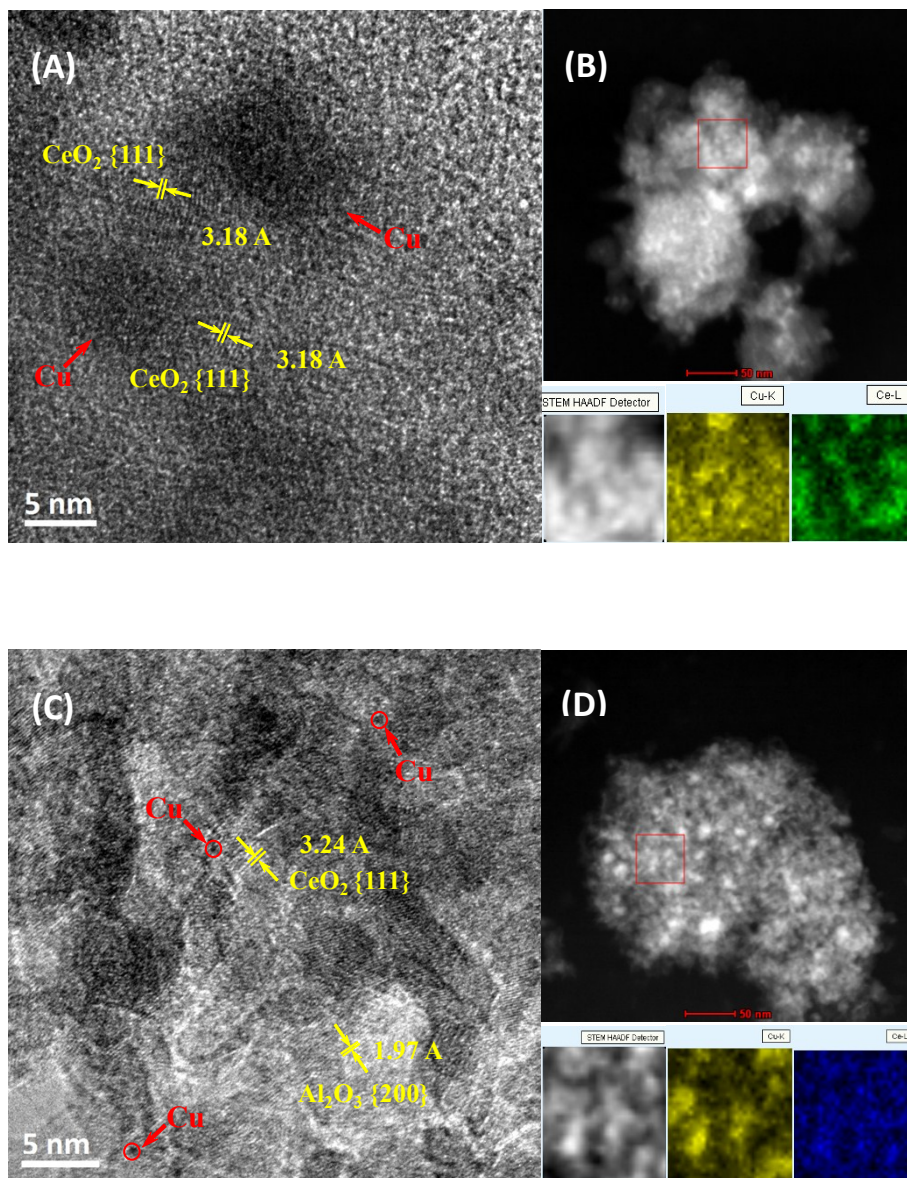

**Fig. S7.** TEM images and corresponding EDX mapping of (A), (B) 3Cu1Ce/SiO<sub>2</sub> and (C), (D) 3Cu1Ce/Al<sub>2</sub>O<sub>3</sub> catalysts after reaction

For the 3Cu1Ce/SiO<sub>2</sub> catalyst, the average particle size of Cu metals was calculated around 15 nm (Fig. S7A), which is larger than that of Cu (9.1 nm) on 3Cu1Ce/AC catalyst with the same Cu loading and Cu/Ce molar ratio. There also exists some

crystal  $\text{CeO}_2$  with size of 4.0 nm in the vicinity of the Cu metal particles, which is also larger than that of  $\text{CeO}_2$  (1.8 nm) on 3Cu1Ce/AC catalyst. It should be noted that no structure in which Cu metals are partially covered by crystal  $\text{CeO}_2$  is present in Figure S7A. Moreover, no significant expansion of the interplanar spacing of  $\text{CeO}_2$  {111} can be observed, suggesting the absence of incorporation of Cu in the crystal lattice of  $\text{CeO}_2$ . This can be also evidenced by comparing the basicity of catalysts in  $\text{CO}_2$ -TPD that a lower  $\text{CO}_2$  desorption temperature is observed on 3Cu1Ce/ $\text{SiO}_2$  relative to 3Cu1Ce/AC catalyst. The corresponding EDX mapping further illustrates that the distribution of  $\text{CeO}_2$  is uneven and does not match that of Cu metals (Fig. S7B), indicating that the contact of Cu with  $\text{CeO}_2$  is less than the case of 3Cu1Ce/AC catalyst. These results emphasize the importance of the close contact between Cu with  $\text{CeO}_2$  that the strong interaction of Cu with  $\text{CeO}_2$  can not only suppress the sintering of Cu and growth of  $\text{CeO}_2$ , but also increase the basicity of  $\text{CeO}_2$ .

For the 3Cu1Ce/ $\text{Al}_2\text{O}_3$  catalyst, small Cu metals with size of less than 1 nm can be observed (Fig. S7C). These small Cu metals are uniformly spread over the catalyst even after the reaction. Only trace of crystal  $\text{CeO}_2$  can be spotted near Cu metals on this catalyst. Since clear characteristic diffraction peaks assignable to  $\text{CeO}_2$  (corresponding to 3.8 nm) can be observed on the reduced catalyst before reaction (Fig. S2), the existence of tiny amounts of crystal  $\text{CeO}_2$  is likely due to the phase transition from crystalline to amorphous during the reaction. Nevertheless, the expansion of the interplanar spacing of  $\text{CeO}_2$  {111} from 3.12 to 3.24 Å implies the strong interaction between Cu metals and  $\text{CeO}_2$ . The EDX mapping reveals a heterogeneous distribution of  $\text{CeO}_2$  over this catalyst and a poor overlap between Cu and  $\text{CeO}_2$  signals (Fig. S7D). Comparing the particle size of Cu metals on 3Cu1Ce/ $\text{Al}_2\text{O}_3$  with 3Cu1Ce/AC catalyst (<1.0 nm vs. 9.1 nm), in which the latter having a strong interaction between Cu and  $\text{CeO}_2$ ,  $\text{Al}_2\text{O}_3$  has a better capability of stabilizing Cu against sintering than  $\text{CeO}_2$ . Thus, majority of Cu metals are in contact with  $\text{Al}_2\text{O}_3$ , although some are incorporated in the crystal lattice of  $\text{CeO}_2$ .

Based on the above analysis, we concluded that Cu metals in contact with  $\text{Al}_2\text{O}_3$  (in the case of  $3\text{Cu}1\text{Ce}/\text{Al}_2\text{O}_3$ ) have the better stability than with  $\text{CeO}_2$  (in the case of  $3\text{Cu}1\text{Ce}/\text{AC}$ ), followed by  $\text{SiO}_2$  (in the case of  $3\text{Cu}1\text{Ce}/\text{SiO}_2$ ). According to the extent of Cu incorporation in the crystal lattice of  $\text{CeO}_2$  and the distribution of Cu and  $\text{CeO}_2$ ,  $3\text{Cu}1\text{Ce}/\text{AC}$  has the highest amount of  $\text{CeO}_2$  with strong basicity among the three catalysts, followed by  $3\text{Cu}1\text{Ce}/\text{Al}_2\text{O}_3$  with less amount of strong basic  $\text{CeO}_2$ , while  $3\text{Cu}1\text{Ce}/\text{SiO}_2$  has the lowest amount of medium/weak basic  $\text{CeO}_2$ . This trend is evidenced by  $\text{CO}_2$ -TPD experiment (Fig. 1A) and also reflected in the variation of the selectivity towards C-C coupling product n-butanol (41.3% on  $3\text{Cu}1\text{Ce}/\text{AC}$ , 12.1% on  $3\text{Cu}1\text{Ce}/\text{Al}_2\text{O}_3$  and 10.2% on  $3\text{Cu}1\text{Ce}/\text{SiO}_2$ ).

## 9. Dependence of the hydrogenation of crotonaldehyde on reaction temperature

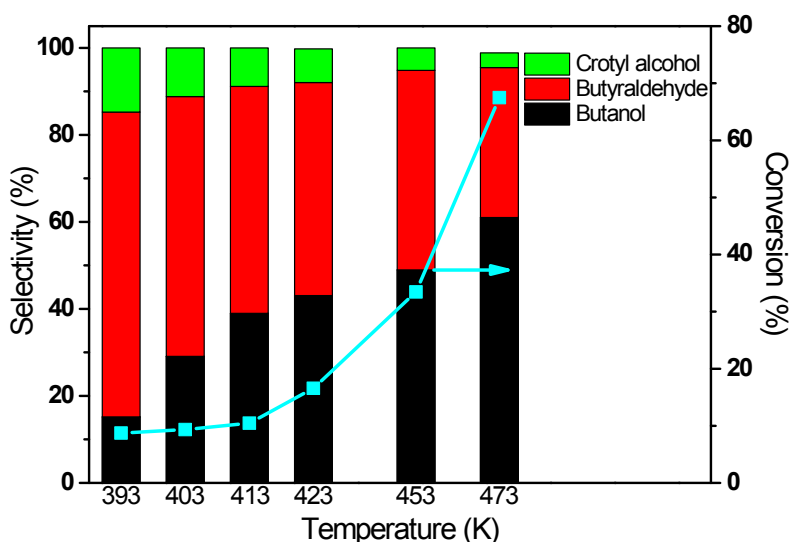

**Fig. S8.** Dependence of the hydrogenation of crotonaldehyde on reaction temperature: catalyst, 0.1g; 2 MPa; H<sub>2</sub>, 30 ml/min; 3.94 vol.% crotonaldehyde in cyclohexane, 0.304 ml/min.

## 10. Function-curves for the overall yield of aldehyde ( $Y_{\text{aldehyde}}$ ) to $W/F$

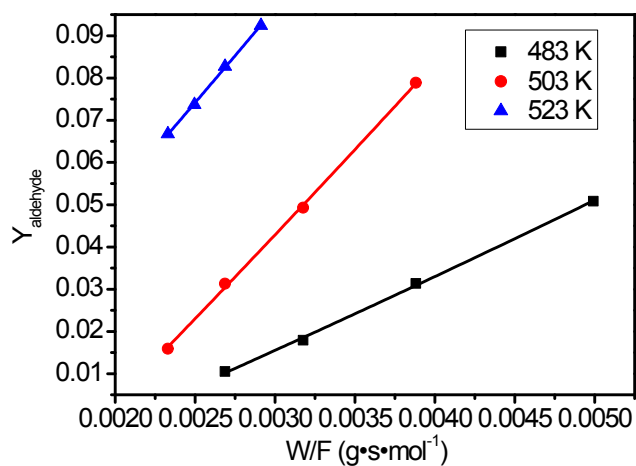

**Fig. S9.** Function-curves for the overall yield of aldehyde ( $Y_{\text{aldehyde}}$ ) to  $W/F$

## 11. Function-curves for the logarithm of reaction rate of ethanol dehydrogenation ( $\ln r_{\text{aldehyde}}$ ) to the logarithm of partial pressure of ethanol ( $\ln P_{\text{ethanol}}$ )

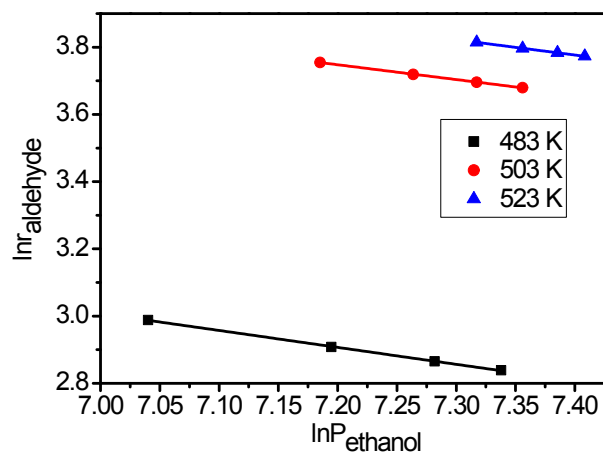

**Fig. S10.** Function-curves for the logarithm of reaction rate of ethanol dehydrogenation ( $\ln r_{\text{aldehyde}}$ ) to the logarithm of partial pressure of ethanol ( $\ln P_{\text{ethanol}}$ )

## 12. Function-curves for the overall yield of condensation products ( $Y_{\text{condensation}}$ ) to W/F

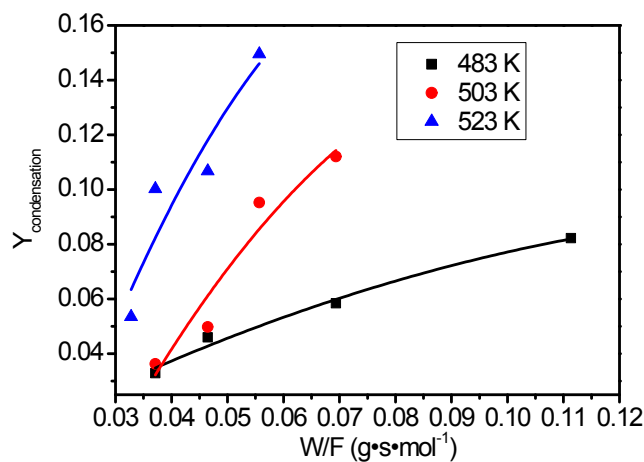

**Fig. S11.** Function-curves for the overall yield of condensation products ( $Y_{\text{condensation}}$ ) to W/F



**13. Function-curves for the logarithm of reaction rate of aldehyde condensation ( $\ln r_{\text{condensation}}$ ) to the logarithm of partial pressure of aldehyde ( $\ln P_{\text{aldehyde}}$ )**

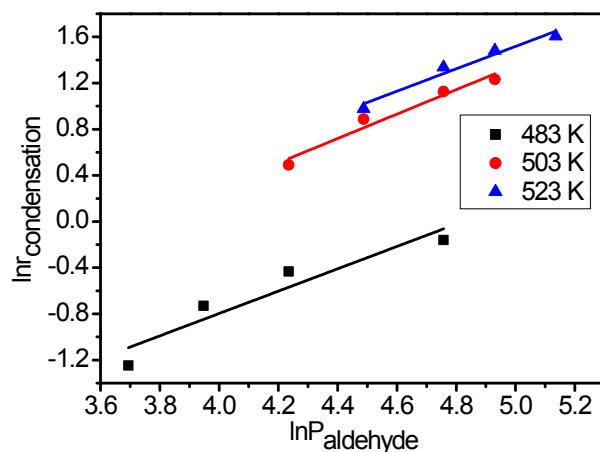

**Fig. S12.** Function-curves for the logarithm of reaction rate of aldehyde condensation ( $\ln r_{\text{condensation}}$ ) to the logarithm of partial pressure of aldehyde ( $\ln P_{\text{aldehyde}}$ )

**14. Function-curves for the overall yield of hydrogenation products ( $Y_{\text{hydrogenation}}$ ) to W/F**

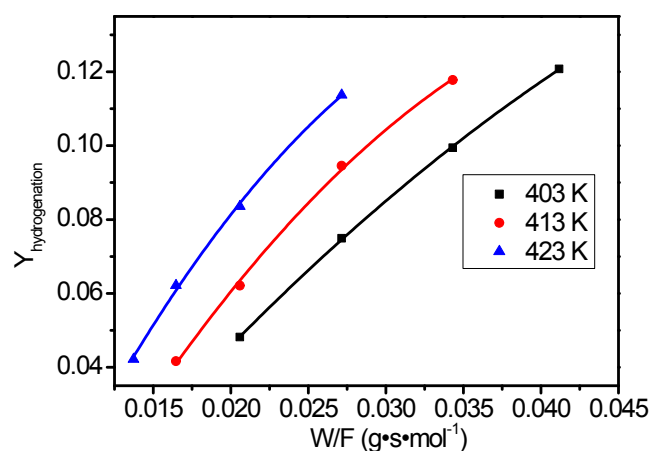

**Fig. S13.** Function-curves for the overall yield of hydrogenation products ( $Y_{\text{hydrogenation}}$ ) to  $W/F$

**15. Function-curves for the logarithm of reaction rate of crotonaldehyde hydrogenation ( $\ln r_{\text{hydrogenation}}$ ) to the logarithm of partial pressure of crotonaldehyde ( $\ln P_{\text{crotonaldehyde}}$ )**

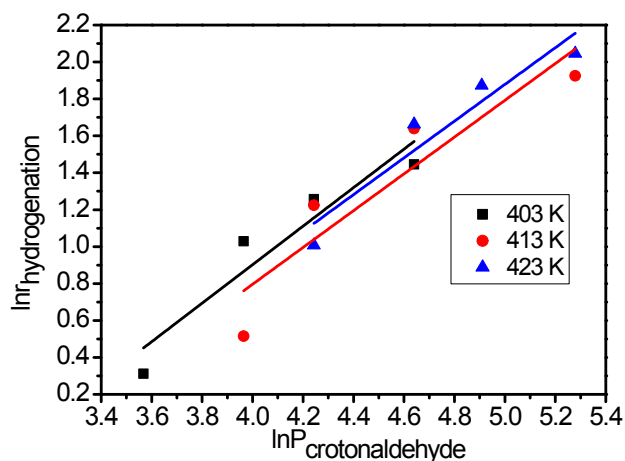

**Fig. S14.** Function-curves for the logarithm of reaction rate of crotonaldehyde hydrogenation ( $\ln r_{\text{hydrogenation}}$ ) to the logarithm of partial pressure of crotonaldehyde ( $\ln P_{\text{crotonaldehyde}}$ )

**16. Arrhenius plots for (A) ethanol dehydrogenation, (B) aldehyde condensation and (C) crotonaldehyde hydrogenation**

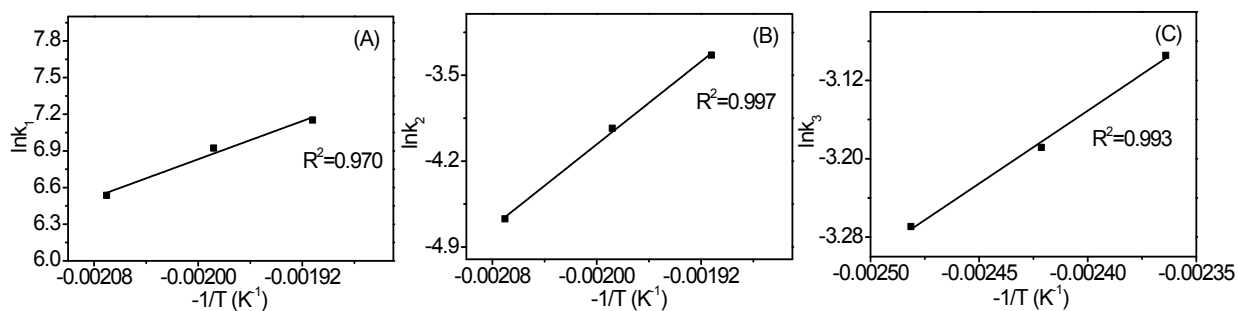

**Fig. S15.** Arrhenius plots for (A) ethanol dehydrogenation, (B) aldehyde condensation and (C) crotonaldehyde hydrogenation

## 17. Textural properties of Cu-based catalysts

| Table S1. Textural properties of Cu-based catalysts |                                                                |                                                               |                                        |                                   |      |                                      |          |
|-----------------------------------------------------|----------------------------------------------------------------|---------------------------------------------------------------|----------------------------------------|-----------------------------------|------|--------------------------------------|----------|
| Catalyst                                            | $S_{\text{BET}}^{\text{[a]}}$<br>( $\text{m}^2\text{g}^{-1}$ ) | $V_{\text{t}}^{\text{[b]}}$<br>( $\text{cm}^3\text{g}^{-1}$ ) | $D_{\text{pore}}^{\text{[c]}}$<br>(nm) | $d_{\text{Cu}}^{\text{[d]}}$ (nm) |      | $d_{\text{CeO}_2}^{\text{[d]}}$ (nm) |          |
|                                                     |                                                                |                                                               |                                        | XRD                               | TEM  | XRD                                  | TEM      |
| Cu/AC                                               | 952.8                                                          | 0.52                                                          | 2.7                                    | 22(4.3)                           | 22.6 | -                                    | -        |
| 5Cu1Ce/AC                                           | 877.5                                                          | 0.48                                                          | 2.7                                    | 9.2(5.9)                          | 10.4 | -                                    | -        |
| 4Cu1Ce/AC                                           | 862.9                                                          | 0.48                                                          | 2.8                                    | 8.7(5.3)                          | 9.0  | -                                    | -        |
| 3Cu1Ce/AC                                           | 861.0                                                          | 0.47                                                          | 2.8                                    | 8.7(5.1)                          | 9.1  | (1.5)                                | (1.8)    |
| 2Cu1Ce/AC                                           | 783.8                                                          | 0.43                                                          | 2.8                                    | 8.6(5.1)                          | 9.1  | (1.8)                                | (2.2)    |
| 1Cu1Ce/AC                                           | 707.9                                                          | 0.39                                                          | 2.9                                    | 8.3(4.9)                          | 8.6  | 4.2(4.5)                             | 4.9(4.8) |
| 3Cu1Ce/SiO <sub>2</sub>                             | 277.0                                                          | 0.82                                                          | 11.9                                   | 15.2(14.6)                        | 16.0 | 3.9(4.0)                             | 4.0(4.0) |
| 3Cu1Ce/Al <sub>2</sub> O <sub>3</sub>               | 190.5                                                          | 0.50                                                          | 10.4                                   | -                                 | -    | (3.8)                                | (3.8)    |

[a] Brunauer-Emmett-Teller surface area. [b] Total pore volume. [c] The average pore diameters. [d] The value in bracket is the average particle diameter of the reduced catalyst before reaction.

## 18. Catalytic performance of various Cu-based catalysts

| Table S2. Catalytic performance of various Cu-based catalysts <sup>[a]</sup> |                |                |               |               |         |                            |                       |                   |
|------------------------------------------------------------------------------|----------------|----------------|---------------|---------------|---------|----------------------------|-----------------------|-------------------|
| Catalyst                                                                     | Conversion (%) | Selectivity(%) |               |               |         |                            |                       | Butanol Yield (%) |
|                                                                              |                | Acetaldehyde   | Butyraldehyde | Ethyl Acetate | Butanol | C6 products <sup>[b]</sup> | Others <sup>[c]</sup> |                   |
| CeO <sub>2</sub> /AC                                                         | 3.1            | 13.5           | 4.4           | 2.2           | 1.6     | 4.9                        | 73.4                  | -                 |
| Cu/AC                                                                        | 1.2            | 10.5           | 0.5           | 0.5           | 12.1    | -                          | 76.4                  | 0.1               |
| Cu/CeO <sub>2</sub>                                                          | 11.7           | 37.7           | 8.8           | 19.9          | 21.1    | 2.8                        | 9.9                   | 2.5               |
| 3Cu1Ce/AC                                                                    | 46.2           | 7.2            | 7.8           | 10.9          | 41.3    | 19.7                       | 13.0                  | 19.1              |

[a] Conversion, selectivity and yield are obtained at steady-state; reaction conditions: catalyst, 1.0 g; 523 K, 2 MPa (N<sub>2</sub>), LHSV=4 ml/(h·g·cat), N<sub>2</sub>/ethanol(v/v)=500:1;  
[b] C6 products include 2-ethylbutyraldehyde, hexaldehyde, 2-ethylbutanol, and 1-hexanol;  
[c] Other products include 1-ethoxyethane, 1,1-diethoxyethane, butyl acetate, etc; specially for CeO<sub>2</sub>/AC, 12.3% diethyl ether, 50% crotonaldehyde, 2.1% 1,1-diethoxyethane; for Cu/AC catalyst, 2.6% 1-ethoxyethane, 55.3% 1,1-diethoxyethane; for Cu/CeO<sub>2</sub> catalysts, 6.1% diethyl ether, 1.7% 1,1-diethoxyethane.

In comparison of the catalytic performance of Cu/CeO<sub>2</sub> with Cu/AC, the ethanol conversion is higher on Cu/CeO<sub>2</sub> (11.7%) than Cu/AC (1.2%), which indicates a better dispersion of Cu metals in Cu/CeO<sub>2</sub> than Cu/AC as a result of stronger metal-support interaction. Besides, the selectivity towards butanol is also higher on Cu/CeO<sub>2</sub> (21.1%) than Cu/AC (12.1%), suggesting the higher

basicity of Cu/CeO<sub>2</sub> than Cu/AC. When supporting Cu and CeO<sub>2</sub> on activated carbon, as in the case of 3Cu1Ce/AC, the selectivity towards butanol is almost doubled to 41.3% whereas the selectivity towards acetaldehyde decreases 5 times from 37.7% to 7.2%. The significant enhancement of selectivity towards butanol is likely due to the presence of acidic functional groups in activated carbon which promotes the dehydration reaction in the condensation process (Scheme S1) and drives the reaction equilibrium towards the formation of crotonaldehyde. Additionally, the activated carbon support further improves the dispersion of Cu metals, leading to much higher ethanol conversion and consequent higher butanol yield.

Moreover, comparing Cu/AC with 3Cu1Ce/AC catalyst, it is evident that the addition of Ce also improves 39 times of the ethanol conversion from 1.2 to 46.2%. This significant enhanced dehydrogenation rate of ethanol is also the result of reaction equilibrium shift towards acetaldehyde consumption when the aldol condensation is promoted by the presence of Ce species. Kinetic analysis supports that the aldol condensation is the decisive step in Guerbet reaction pathway for n-butanol production. The introduction of Ce species significantly lowers the apparent activation energy for aldol condensation in comparison to that over hydroxyapatite [ACS Catal. 2016, 6, 939-948]. Therefore, the presence of Ce species not only raises the selectivity towards n-butanol production, but also improves the ethanol conversion, thus the overall n-butanol yield is promoted.

## 19. Comparison of catalytic performance of Cu-CeO<sub>2</sub>/AC catalysts with other catalysts reported in documentary

| Table S3. Comparison of catalytic performance of Cu-CeO <sub>2</sub> /AC catalysts with other catalysts reported in documentary |       |         |                                                              |                        |                         |                   |                                                                                                    |           |
|---------------------------------------------------------------------------------------------------------------------------------|-------|---------|--------------------------------------------------------------|------------------------|-------------------------|-------------------|----------------------------------------------------------------------------------------------------|-----------|
| Catalyst                                                                                                                        | T (K) | P (MPa) | Other reaction conditions                                    | Ethanol Conversion (%) | Butanol Selectivity (%) | Butanol Yield (%) | Conversion · liquid hourly space velocity (10 <sup>-2</sup> mol·g <sup>-1</sup> ·h <sup>-1</sup> ) | Ref       |
| Rb-Na X zeolite                                                                                                                 | 693   | 0.1     | W/F=5.6 g·h·mol <sup>-1</sup>                                | 0.21                   | 40.9                    | 0.86              | 0.04                                                                                               | 1         |
| MgO                                                                                                                             | 723   | 0.1     | 0.5 g catalyst<br>W/F=20.83 g·h·mol <sup>-1</sup>            | 56.14                  | 32.76                   | 18.39             | 2.69                                                                                               | 2         |
| 3Mg1AlO                                                                                                                         | 623   | 0.1     | W/F=23.33 g·h·mol <sup>-1</sup>                              | 33.2                   | 34.3                    | 11.39             | 1.42                                                                                               | 3         |
| HAP<br>(Ca/P=1.64)                                                                                                              | 573   | 0.1     | Contact time = 1.78 s                                        | 14.7                   | 76.3                    | 11.22             | Unknown                                                                                            | 4         |
| HAP<br>(Sr/P=1.70)                                                                                                              | 573   | 0.1     | W/F=130 g·h·mol <sup>-1</sup>                                | 11.3                   | 86.4                    | 9.76              | 0.09                                                                                               | 4         |
| HTC-500<br>20.7%Ni/Al <sub>2</sub> O <sub>3</sub>                                                                               | 513   | 7       | W/F=11.11 g·h·mol <sup>-1</sup>                              | 10                     | 69                      | 6.9               | 0.90                                                                                               | 6         |
| Cu/HSACeO <sub>2</sub>                                                                                                          | 533   | 10      | LHSV=1.97 h <sup>-1</sup>                                    | 67                     | 44.8                    | 30                | -                                                                                                  | 7         |
| Cu-CeO <sub>2</sub> /AC                                                                                                         | 523   | 2       | W/F=14.30 g·h·mol <sup>-1</sup><br>(LHSV=2 h <sup>-1</sup> ) | 45.6                   | 42.4                    | 19.3              | 3.18                                                                                               | This work |
| Pd-Mg-Al-O                                                                                                                      | 473   | 0.1     | 0.5 g catalyst<br>39.5 g ethanol<br>Reaction time 5 h        | 3.8                    | 72.7                    | 2.76              | 1.31                                                                                               | 3         |
| HTC-500<br>20.7%Ni/Al <sub>2</sub> O <sub>3</sub>                                                                               | 523   | 7       | 3.3 g catalyst<br>80 g ethanol<br>reaction time = 72 h       | 25                     | 80                      | 20                | 0.18                                                                                               | 5         |
| Cu-CeO <sub>2</sub> /AC                                                                                                         | 523   | 0.1     | 3.3 g catalyst<br>80 g ethanol<br>reaction time = 12 h       | 35.1                   | 49.8                    | 17.5              | 1.54                                                                                               | This work |
| Cu-CeO <sub>2</sub> /AC                                                                                                         | 523   | 0.1     | 3.3 g catalyst<br>80 g ethanol<br>reaction time = 48 h       | 39.1                   | 55.2                    | 21.6              | 0.43                                                                                               | This work |

The comparison of catalytic performance in fixed-bed reactors is summarized in the first part of Table S3, while those in batch reactors is compiled in the second part. Our Cu-CeO<sub>2</sub>/AC catalyst exhibits the highest reaction rate and butanol yield among all other catalysts in fixed-bed reactions. In batch reactor, we have performed the reaction in 12 h and 48 h separately. After 12 h of reaction, up to 17.5% of butanol yield can be obtained with the highest reaction rate among other catalysts. Further increasing the reaction time to 48 decreases the average reaction rate but raises the butanol yield to the highest 21.6%. The decrease in the average reaction rate is probably due to the more competitive adsorption of ethanol with other reaction

intermediates and products on Cu-CeO<sub>2</sub>/AC catalyst after 12 h of reaction. As provided by kinetic analysis, the enhanced reaction rate and butanol yield are fundamentally ascribed to the much lower apparent activation energies for ethanol dehydrogenation, aldol condensation and rehydrogenation.

## 20. Experiment data for macro-kinetics of ethanol dehydrogenation

| Table S4. Experiment data for macro-kinetics of ethanol dehydrogenation <sup>[a]</sup> |       |                                     |                               |                                 |                            |                           |
|----------------------------------------------------------------------------------------|-------|-------------------------------------|-------------------------------|---------------------------------|----------------------------|---------------------------|
| number                                                                                 | T (K) | F <sub>N<sub>2</sub></sub> (ml/min) | F <sub>ethanol</sub> (ml/min) | W/F·10 <sup>-3</sup> (g·s/μmol) | P <sub>ethanol</sub> (kPa) | Y <sub>aldehyde</sub> (%) |
| 1                                                                                      | 483   | 44.0                                | 0.35                          | 4.9910                          | 1505                       | 5.08                      |
| 2                                                                                      | 483   | 56.8                                | 0.45                          | 3.8819                          | 1505                       | 3.13                      |
| 3                                                                                      | 483   | 69.4                                | 0.55                          | 3.1761                          | 1505                       | 1.79                      |
| 4                                                                                      | 483   | 82.4                                | 0.65                          | 2.6874                          | 1505                       | 1.05                      |
| 5                                                                                      | 483   | 69.4                                | 0.24                          | 7.2785                          | 1142                       | 9.09                      |
| 6                                                                                      | 483   | 69.4                                | 0.36                          | 4.8523                          | 1332                       | 7.37                      |
| 7                                                                                      | 483   | 69.4                                | 0.48                          | 3.6392                          | 1454                       | 4.32                      |
| 8                                                                                      | 483   | 69.4                                | 0.6                           | 2.9114                          | 1538                       | 3.01                      |
| 9                                                                                      | 503   | 56.8                                | 0.45                          | 3.8819                          | 1505                       | 7.88                      |
| 10                                                                                     | 503   | 69.4                                | 0.55                          | 3.1761                          | 1505                       | 4.93                      |
| 11                                                                                     | 503   | 82.4                                | 0.65                          | 2.6874                          | 1505                       | 3.13                      |
| 12                                                                                     | 503   | 94.7                                | 0.75                          | 2.3291                          | 1505                       | 1.59                      |
| 13                                                                                     | 503   | 69.4                                | 0.35                          | 4.9910                          | 1320                       | 11.93                     |
| 14                                                                                     | 503   | 69.4                                | 0.45                          | 3.8819                          | 1428                       | 8.22                      |
| 15                                                                                     | 503   | 69.4                                | 0.55                          | 3.1761                          | 1506                       | 4.61                      |
| 16                                                                                     | 503   | 69.4                                | 0.65                          | 2.6874                          | 1565                       | 2.84                      |
| 17                                                                                     | 523   | 76.0                                | 0.6                           | 2.9114                          | 1505                       | 9.24                      |
| 18                                                                                     | 523   | 82.4                                | 0.65                          | 2.6874                          | 1505                       | 8.27                      |
| 19                                                                                     | 523   | 88.3                                | 0.7                           | 2.4955                          | 1505                       | 7.37                      |
| 20                                                                                     | 523   | 94.7                                | 0.75                          | 2.3291                          | 1505                       | 6.67                      |
| 21                                                                                     | 523   | 69.4                                | 0.55                          | 3.1761                          | 1506                       | 13.55                     |
| 22                                                                                     | 523   | 69.4                                | 0.65                          | 2.6874                          | 1565                       | 7.43                      |
| 23                                                                                     | 523   | 69.4                                | 0.75                          | 2.3291                          | 1612                       | 5.10                      |
| 24                                                                                     | 523   | 69.4                                | 0.85                          | 2.0551                          | 1650                       | 4.15                      |

[a] 3Cu1Ce/AC catalyst (80-100 mesh), 0.5 g; 2 MPa; F<sub>N<sub>2</sub></sub>, flow rate of nitrogen; F<sub>ethanol</sub>, flow rate of ethanol; P<sub>ethanol</sub>, partial pressure of ethanol; Y<sub>aldehyde</sub>, overall yield of aldehyde

## 21. Experiment data for macro-kinetics of acetaldehyde condensation

| Table S5. Experiment data for macro-kinetics of acetaldehyde condensation <sup>[a]</sup> |       |                                     |                                |                                 |                             |                               |
|------------------------------------------------------------------------------------------|-------|-------------------------------------|--------------------------------|---------------------------------|-----------------------------|-------------------------------|
| number                                                                                   | T (K) | F <sub>N<sub>2</sub></sub> (ml/min) | F <sub>aldehyde</sub> (ml/min) | W/F·10 <sup>-2</sup> (g·s/μmol) | P <sub>aldehyde</sub> (kPa) | Y <sub>condensation</sub> (%) |
| 1                                                                                        | 483   | 34.1                                | 0.008                          | 11.1336                         | 88.9                        | 8.22                          |
| 2                                                                                        | 483   | 54.6                                | 0.012                          | 6.9357                          | 88.9                        | 5.84                          |
| 3                                                                                        | 483   | 81.9                                | 0.018                          | 4.6492                          | 88.9                        | 4.59                          |
| 4                                                                                        | 483   | 102.3                               | 0.023                          | 3.7112                          | 88.9                        | 3.29                          |
| 5                                                                                        | 483   | 68.2                                | 0.007                          | 12.6292                         | 40.2                        | 4.65                          |
| 6                                                                                        | 483   | 68.2                                | 0.009                          | 9.7259                          | 51.8                        | 4.73                          |
| 7                                                                                        | 483   | 68.2                                | 0.012                          | 7.2321                          | 69.1                        | 6.55                          |
| 8                                                                                        | 483   | 68.2                                | 0.020                          | 4.1889                          | 116.4                       | 6.96                          |
| 9                                                                                        | 503   | 54.6                                | 0.012                          | 6.9357                          | 88.9                        | 11.20                         |
| 10                                                                                       | 503   | 68.2                                | 0.015                          | 5.5668                          | 88.9                        | 9.52                          |
| 11                                                                                       | 503   | 81.9                                | 0.018                          | 4.6492                          | 88.9                        | 4.97                          |
| 12                                                                                       | 503   | 102.3                               | 0.023                          | 3.7112                          | 88.9                        | 3.62                          |
| 13                                                                                       | 503   | 68.2                                | 0.012                          | 7.2321                          | 69.1                        | 5.05                          |
| 14                                                                                       | 503   | 68.2                                | 0.015                          | 5.5668                          | 88.9                        | 8.21                          |
| 15                                                                                       | 503   | 68.2                                | 0.020                          | 4.1889                          | 116.4                       | 9.16                          |
| 16                                                                                       | 503   | 68.2                                | 0.024                          | 3.4821                          | 138.4                       | 6.81                          |
| 17                                                                                       | 523   | 68.2                                | 0.015                          | 5.5668                          | 88.9                        | 14.95                         |
| 18                                                                                       | 523   | 81.9                                | 0.018                          | 4.6492                          | 88.9                        | 10.67                         |
| 19                                                                                       | 523   | 102.3                               | 0.023                          | 3.7112                          | 88.9                        | 10.03                         |
| 20                                                                                       | 523   | 116.0                               | 0.026                          | 3.2797                          | 88.9                        | 5.35                          |
| 21                                                                                       | 523   | 68.2                                | 0.015                          | 5.5668                          | 88.9                        | 12.41                         |
| 22                                                                                       | 523   | 68.2                                | 0.020                          | 4.1889                          | 116.4                       | 13.84                         |
| 23                                                                                       | 523   | 68.2                                | 0.024                          | 3.4821                          | 138.4                       | 17.99                         |
| 24                                                                                       | 523   | 68.2                                | 0.030                          | 2.7834                          | 170.0                       | 19.62                         |

[a] 3Cu1Ce/AC catalyst (80-100 mesh), 0.25 g; 2 MPa; F<sub>N<sub>2</sub></sub>, flow rate of nitrogen; F<sub>aldehyde</sub>, flow rate of aldehyde; P<sub>aldehyde</sub>, partial pressure of aldehyde; Y<sub>condensation</sub>, overall yield of condensation products including crotonaldehyde, butyraldehyde, crotonyl alcohol and butanol.



## 22. Experiment data for macro-kinetics of crotonaldehyde hydrogenation

| Table S6. Experiment data for macro-kinetics of crotonaldehyde hydrogenation <sup>[a]</sup> |       |                                     |                                      |                                 |                                   |                                |
|---------------------------------------------------------------------------------------------|-------|-------------------------------------|--------------------------------------|---------------------------------|-----------------------------------|--------------------------------|
| number                                                                                      | T (K) | F <sub>H<sub>2</sub></sub> (ml/min) | F <sub>crotonaldehyde</sub> (ml/min) | W/F·10 <sup>-2</sup> (g·s/μmol) | P <sub>crotonaldehyde</sub> (kPa) | Y <sub>hydrogenation</sub> (%) |
| 1                                                                                           | 403   | 30.0                                | 0.012                                | 4.1176                          | 69.5                              | 12.08                          |
| 2                                                                                           | 403   | 36.0                                | 0.014                                | 3.4314                          | 69.5                              | 9.94                           |
| 3                                                                                           | 403   | 45.0                                | 0.018                                | 2.7149                          | 69.5                              | 7.49                           |
| 4                                                                                           | 403   | 60.0                                | 0.024                                | 2.0588                          | 69.5                              | 4.81                           |
| 5                                                                                           | 403   | 60.0                                | 0.008                                | 6.1765                          | 35.4                              | 11.33                          |
| 6                                                                                           | 403   | 60.0                                | 0.012                                | 4.1176                          | 52.7                              | 9.34                           |
| 7                                                                                           | 403   | 60.0                                | 0.016                                | 3.0882                          | 69.6                              | 7.93                           |
| 8                                                                                           | 403   | 60.0                                | 0.024                                | 2.0418                          | 103.5                             | 5.80                           |
| 9                                                                                           | 413   | 36.0                                | 0.014                                | 3.4314                          | 69.5                              | 11.78                          |
| 10                                                                                          | 413   | 45.0                                | 0.018                                | 2.7149                          | 69.5                              | 9.45                           |
| 11                                                                                          | 413   | 60.0                                | 0.024                                | 2.0588                          | 69.5                              | 6.21                           |
| 12                                                                                          | 413   | 75.0                                | 0.030                                | 1.6471                          | 69.5                              | 4.16                           |
| 13                                                                                          | 413   | 60.0                                | 0.012                                | 4.1176                          | 52.7                              | 10.47                          |
| 14                                                                                          | 413   | 60.0                                | 0.016                                | 3.0882                          | 69.6                              | 9.98                           |
| 15                                                                                          | 413   | 60.0                                | 0.024                                | 2.0418                          | 103.5                             | 7.68                           |
| 16                                                                                          | 413   | 60.0                                | 0.048                                | 1.0251                          | 196.1                             | 5.13                           |
| 17                                                                                          | 423   | 45.0                                | 0.018                                | 2.7149                          | 69.5                              | 11.37                          |
| 18                                                                                          | 423   | 60.0                                | 0.024                                | 2.0588                          | 69.5                              | 8.36                           |
| 19                                                                                          | 423   | 75.0                                | 0.030                                | 1.6471                          | 69.5                              | 6.22                           |
| 20                                                                                          | 423   | 90.0                                | 0.036                                | 1.3725                          | 69.5                              | 4.22                           |
| 21                                                                                          | 423   | 60.0                                | 0.016                                | 3.0882                          | 69.6                              | 12.55                          |
| 22                                                                                          | 423   | 60.0                                | 0.024                                | 2.0418                          | 103.5                             | 11.24                          |
| 23                                                                                          | 423   | 60.0                                | 0.032                                | 1.5345                          | 135.4                             | 9.49                           |
| 24                                                                                          | 423   | 60.0                                | 0.048                                | 1.0251                          | 196.1                             | 7.49                           |

[a] 3Cu1Ce/AC catalyst (80-100 mesh), 0.1 g; 2 MPa; F<sub>H<sub>2</sub></sub>, flow rate of hydrogen; F<sub>crotonaldehyde</sub>, flow rate of crotonaldehyde; P<sub>crotonaldehyde</sub>, partial pressure of crotonaldehyde; Y<sub>condensation</sub>, overall yield of hydrogenation products including butyraldehyde, crotonyl alcohol and butanol.

## 23. The rate constants and reaction orders of different temperature for various reactions

| Table S7. The rate constants and reaction orders at different temperatures for various reactions <sup>[a]</sup> |       |                                                              |                |
|-----------------------------------------------------------------------------------------------------------------|-------|--------------------------------------------------------------|----------------|
| Ethanol dehydrogenation                                                                                         | T (K) | lnk <sub>1</sub> [μmol/ (g·s·kPa <sup>n<sub>1</sub></sup> )] | n <sub>1</sub> |
|                                                                                                                 | 483   | 6.53583                                                      | -0.50          |
|                                                                                                                 | 503   | 6.92242                                                      | -0.44          |
|                                                                                                                 | 523   | 7.15237                                                      | -0.46          |
| Acetaldehyde condensation                                                                                       | T (K) | lnk <sub>2</sub> [μmol/ (g·s·kPa <sup>n<sub>2</sub></sup> )] | n <sub>2</sub> |
|                                                                                                                 | 483   | -4.67110                                                     | 0.97           |
|                                                                                                                 | 503   | -3.93211                                                     | 1.06           |
|                                                                                                                 | 523   | -3.33666                                                     | 0.97           |
| Crotonaldehyde hydrogenation                                                                                    | T (K) | lnk <sub>3</sub> [μmol/ (g·s·kPa <sup>n<sub>3</sub></sup> )] | n <sub>3</sub> |
|                                                                                                                 | 403   | -3.26926                                                     | 1.04           |
|                                                                                                                 | 413   | -3.18846                                                     | 1.00           |
|                                                                                                                 | 423   | -3.09440                                                     | 0.99           |

[a] k<sub>1</sub>, n<sub>1</sub>, k<sub>2</sub>, n<sub>2</sub>, k<sub>3</sub> and n<sub>3</sub>, rate constants and reaction orders of ethanol dehydrogenation, acetaldehyde condensation and crotonaldehyde hydrogenation

## 24. The apparent activation energies and frequency factors for various reactions

| Table S8. The apparent activation energies and frequency factors for various reactions |                         |                           |                              |
|----------------------------------------------------------------------------------------|-------------------------|---------------------------|------------------------------|
|                                                                                        | Ethanol dehydrogenation | Acetaldehyde condensation | Crotonaldehyde hydrogenation |
| Ea (KJ/mol)                                                                            | 32.5                    | 70.1                      | 12.4                         |
| A [ $\mu\text{mol}/(\text{g}\cdot\text{s}\cdot\text{kPa}^n)$ , $n=1,2$ and $3$ ]       | 228267.3                | 364707.2                  | 1.3                          |

## 25. The Guerbet reaction pathway

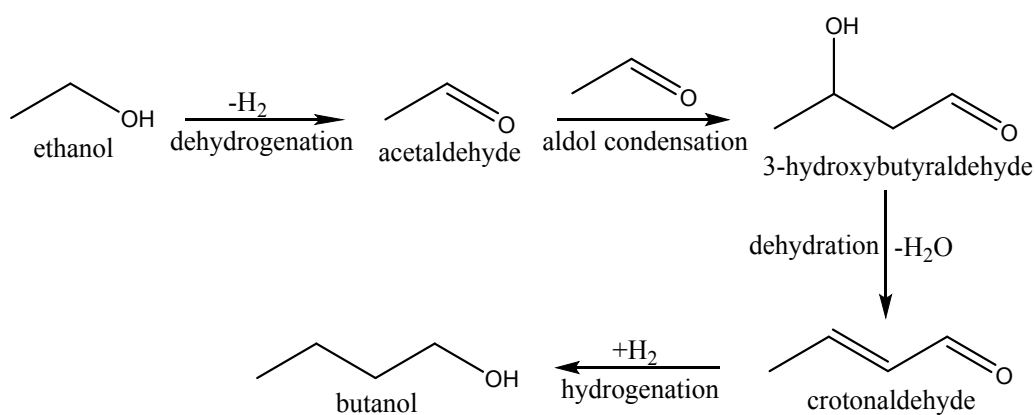

Scheme S1. The Guerbet reaction pathway

## 26. The hydrogen-transfer pathway

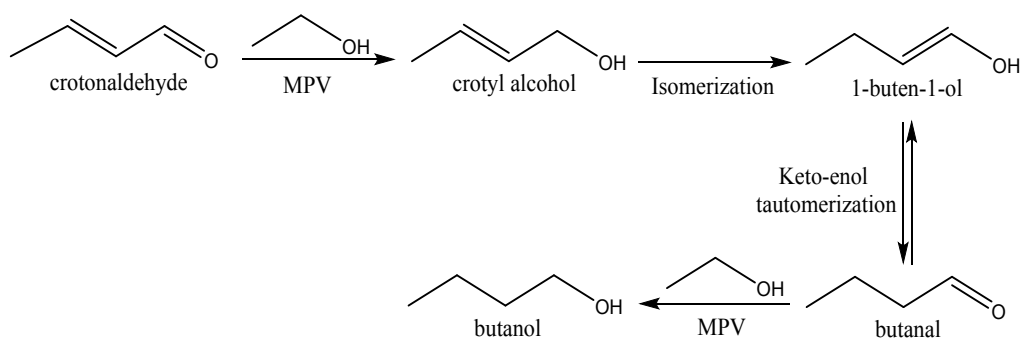

Scheme S2. The hydrogen-transfer pathway

The Meerwein–Pondorf–Verley (MPV) hydrogen-transfer reaction, which is catalyzed by Lewis acids or bases, is an important reaction for the hydrogenation of crotonaldehyde to butanol. According to the study by Bell et al. [ACS Catal. 2016, 6, 939-948], the hydrogen-transfer pathway between crotonaldehyde and ethanol is shown in Scheme S2.

It seems that the hydrogenation of crotonaldehyde prefers C=O reduction to form crotyl alcohol in the MPV reaction, probably due to the involvement of surface hydrides [C. Copéret et al. Chem. Rev. 2016, 116, 8463-8505]. Thus, the presence of crotyl alcohol is likely the indicator of occurrence of MPV-type reactions. However, no crotyl alcohol was detected in our work. Moreover, the formation of H atoms instead of hydride species is more favorable on reducible materials such as CeO<sub>2</sub> and TiO<sub>2</sub>, due to their small band gap easing the formation of hydroxyls and transfer of electrons to the conduction band when contacting with H<sub>2</sub> [C. Copéret et al. Chem. Rev. 2016, 116, 8463-8505]. Therefore, the introduction of CeO<sub>2</sub> did not facilitate the MPV reaction in our reaction system. CeO<sub>2</sub> mainly contributed to the enhanced condensation activity as basic sites. This statement can be verified by the product distribution of CeO<sub>2</sub>/AC catalyst as shown in Table S2, where no crotyl alcohol while high selectivity towards crotonaldehyde is observed.

To compare the rates of C=C vs C=O hydrogenation, we investigated the dependence of hydrogenation of pure crotonaldehyde on reaction temperature in the presence of H<sub>2</sub> over 3Cu1Ce/AC catalyst. The result presented in Figure S8 illustrates the major intermediate of the hydrogenation of crotonaldehyde is butyraldehyde, as a result of C=C hydrogenation over the reaction temperatures of 393-473K. Thus, the hydrogenation rate of C=C is much faster than that of C=O. Increasing reaction temperature can accelerate the hydrogenation rates of both C=C and C=O. Although higher reaction temperature (>473 K) was also applied in this investigation, a severe catalyst deactivation due to the polymerization of crotonaldehyde was observed, which may alter the composition of active sites of 3Cu1Ce/AC catalyst, thus the result is not

presented here. On the contrary, in the ethanol upgrading reaction, once crotonaldehyde was formed, it could be rapidly hydrogenated. Therefore, no crotonaldehyde was detected and the Cu-Ce/AC catalysts were stable over 12 h.

Based on the above discussion, we propose H atoms from the dehydrogenation of ethanol are the main H source for the hydrogenation reaction, especially in the absence of any external H<sub>2</sub> gas in the reactant stream. Although both Cu metals and CeO<sub>2</sub> in Cu-Ce/AC are able to dehydrogenate ethanol to form H atoms, Cu metals have much higher reactivity than CeO<sub>2</sub>. In this context, once crotonaldehyde is formed on CeO<sub>2</sub>, it migrates to Cu metals where the hydrogenation of C=C bonds of crotonaldehyde takes place and generates butyraldehyde as the major intermediate.
